# Supplementary material
Source: PubMed Central journal article supplement (PMC5470402)
Supplement: jamaophthalmol-135-363-s001.pdf [file jamaophthalmol-135-363-s001.pdf]

## Supplementary Online Content

Eadie BD, Etminan M, Carleton BC, Maberley DA, Mikelberg FS. Association of repeated intravitreal bevacizumab injections with risk of glaucoma surgery. *JAMA Ophthalmol*. Published online March 16, 2017. doi: 10.1001/jamaophthalmol.2017.0059

**eTable.** Crude and Adjusted Rate Ratios for Glaucoma Surgery and Total Number of Intravitreal Bevacizumab Injections

This supplementary material has been provided by the authors to give readers additional information about their work.

**eTable.** Crude and Adjusted Rate Ratios for Glaucoma Surgery and Total Number of Intravitreal Bevacizumab Injections

|                                     | <b>Cases<sup>a</sup></b> | <b>Controls<sup>b</sup></b> | <b>Crude Rate Ratio</b> | <b>Adjusted Rate Ratio<sup>c</sup></b> | <b>95% Confidence Intervals</b> |
|-------------------------------------|--------------------------|-----------------------------|-------------------------|----------------------------------------|---------------------------------|
| <b>Number of Subjects</b>           | 74                       | 740                         |                         |                                        |                                 |
| <b>Number of Injections &lt;=6</b>  | 41 (55.4)                | 484 (65.4)                  | 1.00                    | 1.00                                   | Reference                       |
| <b>Number of Injections 7-11</b>    | 18 (24.3)                | 148 (20.0)                  | 1.60                    | 1.67                                   | 0.86-3.23                       |
| <b>Number of Injections &gt;=12</b> | 15 (20.3)                | 108 (14.6)                  | 2.09                    | 2.61                                   | 1.14-5.98                       |

Percentages are shown in parentheses.

<sup>a</sup>Cases are defined as individuals identified by glaucoma surgery.

<sup>b</sup>Controls are matched for age, pre-existing glaucoma, cohort entry date, and duration of follow-up.

<sup>c</sup>Rate ratios have been adjusted for the variables in table 1.
